# Supplementary material for: Photocatalytic conversion of 5-hydroxymethylfurfural using mixed halide perovskite MAPbBrxCl3−x quantum dots
Source: Royal Society of Chemistry journal article supplement (doi:10.1039/d4ta04910a), 2024-01-01
Supplement: d4ta04910a1.pdf [file d4ta04910a1.pdf]

## Supporting Information

### Photocatalytic Conversion of 5-Hydroxymethylfurfural using Mixed Halide

#### Perovskite $\text{MAPbBr}_x\text{Cl}_{3-x}$ Quantum Dots

*Jaemin Han<sup>a</sup>, Hangil Lee<sup>b\*</sup>, and Hyun Sung Kim<sup>a\*</sup>*

<sup>a</sup>BB21 Plus Program, Department of Chemistry, Pukyong National University, Busan 48513, Republic of Korea

<sup>b</sup>Department of Chemistry Sookmyung Women's University, Seoul 04310, Republic of Korea

## Table of Contents

|                                                                                                                                                                                                                                                                                      |    |
|--------------------------------------------------------------------------------------------------------------------------------------------------------------------------------------------------------------------------------------------------------------------------------------|----|
| <b>Figure S1.</b> Enlarged XRD pattern corresponding to (001) plane of perovskite QDs samples .....                                                                                                                                                                                  | 3  |
| <b>Figure S2.</b> Method of band gap energy ( $E_g$ ) determination from the Tauc plot for perovskite QDs samples.....                                                                                                                                                               | 4  |
| <b>Figure S3.</b> FE-SEM images of (a, b) MAPbBr <sub>2</sub> Cl <sub>1</sub> bulk size materials and (c, d) MAPbBr <sub>2</sub> Cl <sub>1</sub> QDs. ....                                                                                                                           | 5  |
| <b>Figure S4.</b> XRD patterns, optical band gap energy and band edge position of MAPbBr <sub>2</sub> Cl <sub>1</sub> bulk size materials and MAPbBr <sub>2</sub> Cl <sub>1</sub> QDs.....                                                                                           | 6  |
| <b>Figure S5.</b> XRD patterns, TEM images and XPS spectra of MAPbBr <sub>2</sub> Cl <sub>1</sub> QD (after photocatalytic reaction). ....                                                                                                                                           | 7  |
| <b>Figure S6.</b> Recycle tests result of MAPbBr <sub>2</sub> Cl <sub>1</sub> QDs capped with octanoic acid and octylamine. ....                                                                                                                                                     | 7  |
| <b>Figure S7.</b> Various atmosphere condition for photocatalytic reaction using MAPbBr <sub>2</sub> Cl <sub>1</sub> QDs.....                                                                                                                                                        | 8  |
| <b>Figure S8.</b> Photoluminescence (PL) spectra of MAPbBr <sub>3</sub> QD, MAPbBr <sub>2</sub> Cl <sub>1</sub> QD and MAPbCl <sub>3</sub> QD in the presence of O <sub>2</sub> .....                                                                                                | 9  |
| <b>Figure S9.</b> Absorption spectra of in the presence of KI for indicating H <sub>2</sub> O <sub>2</sub> generation as photocatalytic reaction progress using MAPbBr <sub>2</sub> Cl <sub>1</sub> QDs, bulk MAPbBr <sub>2</sub> Cl <sub>1</sub> and absence of photocatalyst. .... | 10 |
| <b>Figure S10.</b> Comparison with CdS QDs, decorated CdS and Zinc Indium sulfide nanoparticles. ....                                                                                                                                                                                | 11 |
| <b>Table S1.</b> The surface to inner concentration ratio of Br <sup>-</sup> and Cl <sup>-</sup> ions in the MAPbBr <sub>x</sub> Cl <sub>3-x</sub> QDs.....                                                                                                                          | 12 |
| <b>Table S2.</b> Comparison of photocatalytic efficiency with other literatures. ....                                                                                                                                                                                                | 13 |
| <b>References.</b> .....                                                                                                                                                                                                                                                             | 14 |

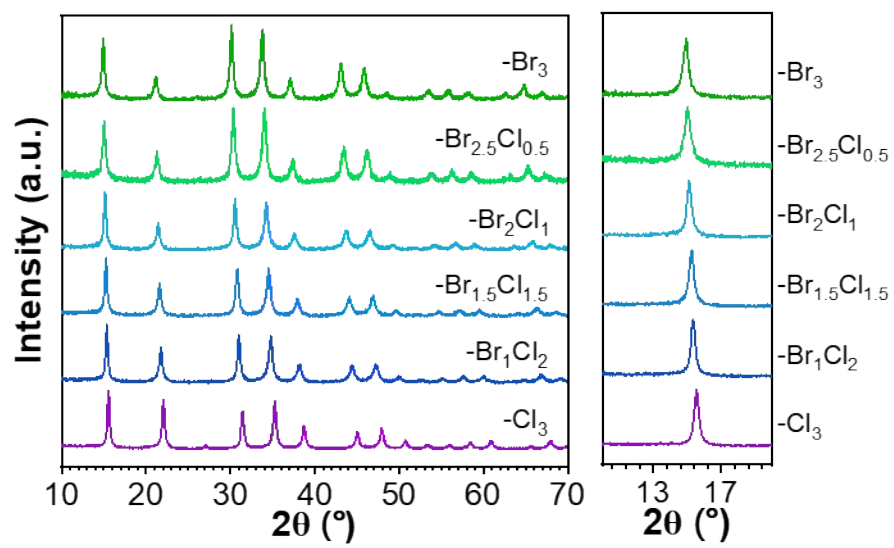

**Figure S1.** Enlarged XRD pattern corresponding to (001) plane of perovskite QDs samples.

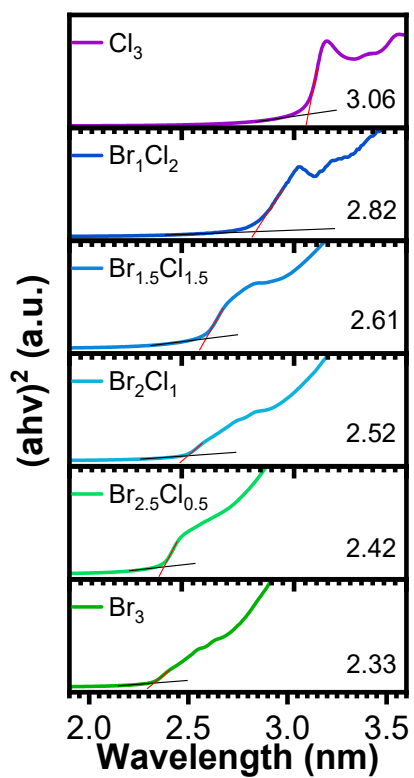

**Figure S2.** Method of band gap energy ( $E_g$ ) determination from the Tauc plot for perovskite QDs samples.

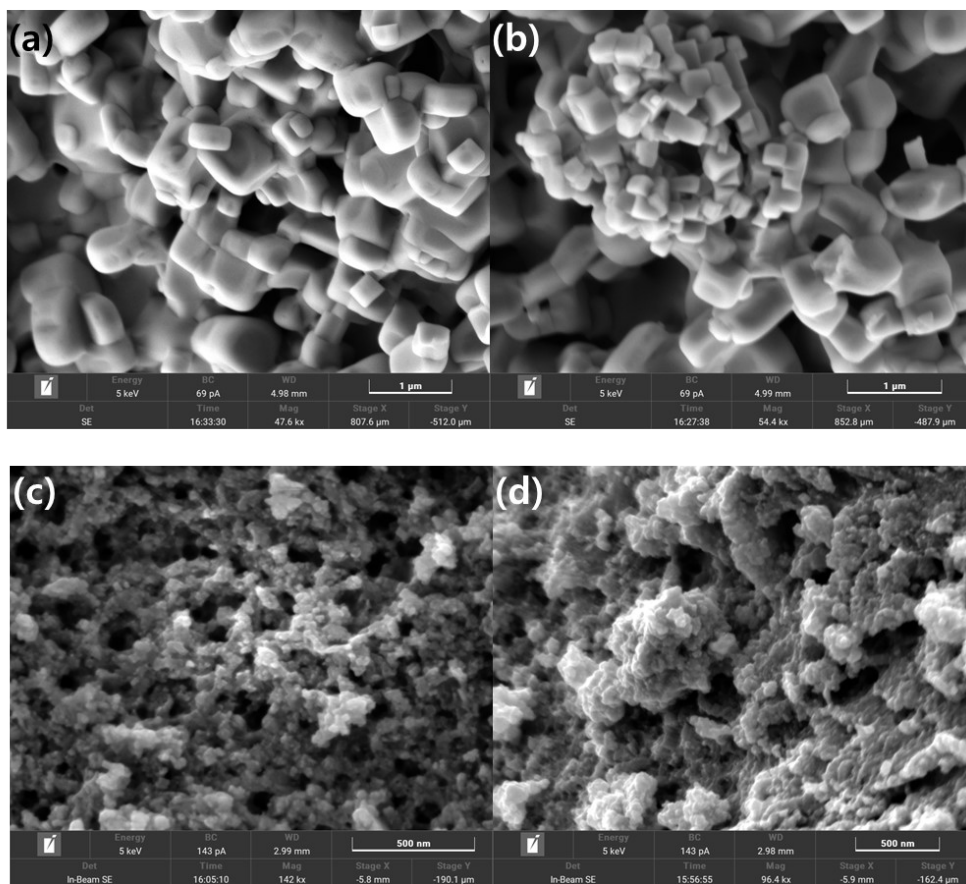

**Figure S3.** FE-SEM images of (a, b) MAPbBr<sub>2</sub>Cl<sub>1</sub> bulk size materials and (c, d) MAPbBr<sub>2</sub>Cl<sub>1</sub> QDs.

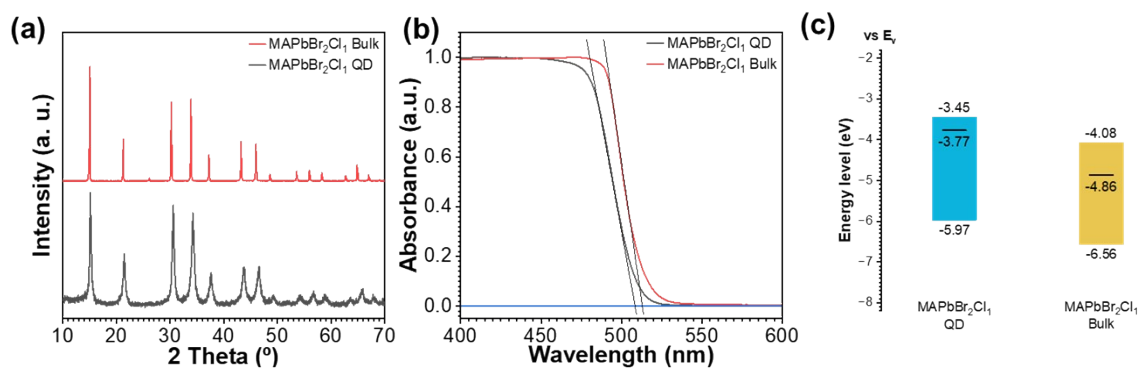

**Figure S4.** (a) XRD pattern, (b) optical band gap energy and (c) band edge position of MAPbBr<sub>2</sub>Cl<sub>1</sub> bulk size materials and MAPbBr<sub>2</sub>Cl<sub>1</sub> QDs.

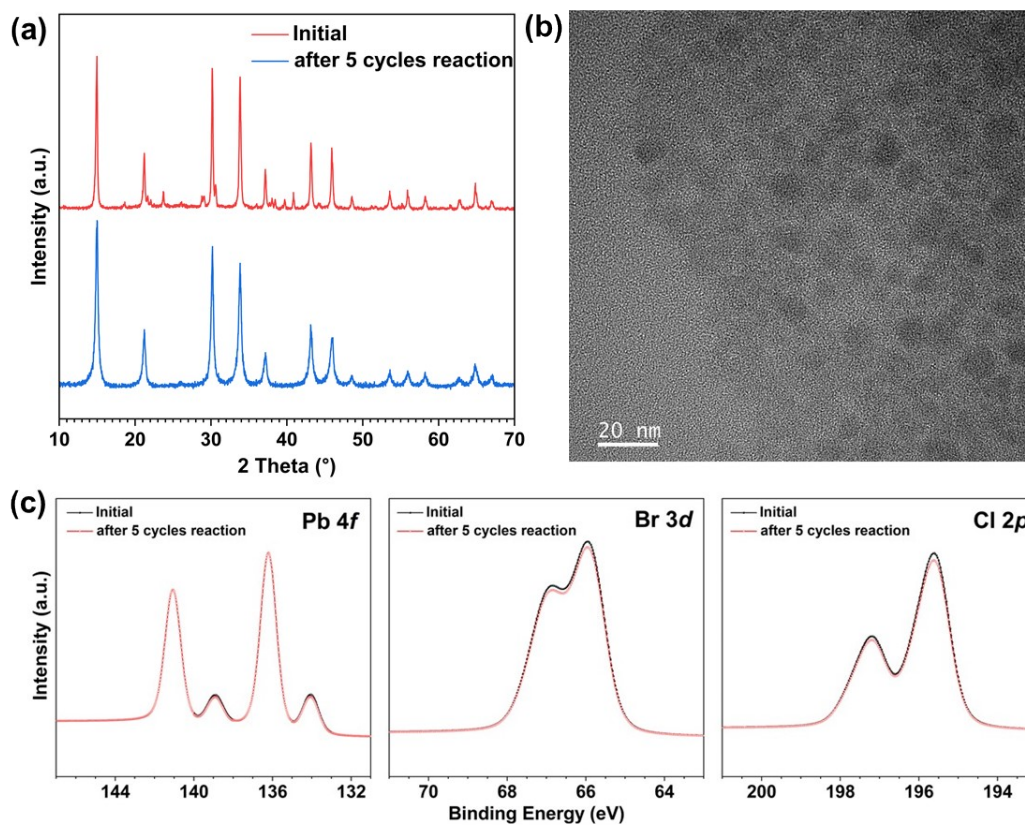

**Figure S5.** (a) XRD patterns, (b) TEM images and (c) XPS spectra of initial and recycled MAPbBr<sub>2</sub>Cl<sub>1</sub> QDs as indicated.

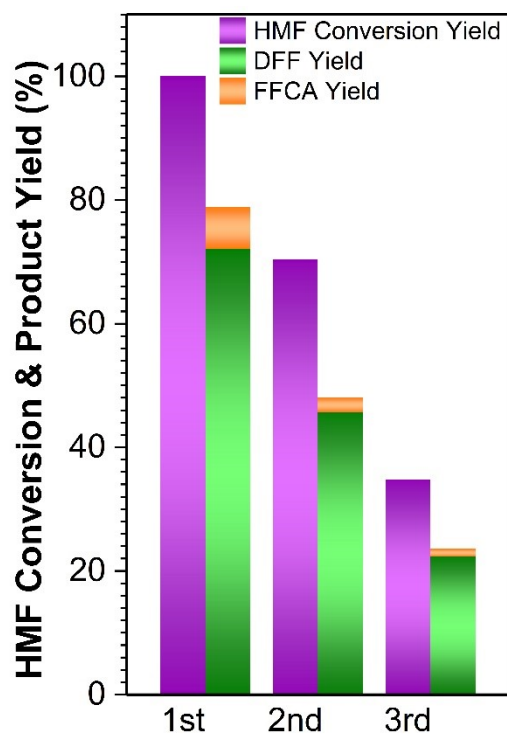

**Figure S6.** Recycle tests result of MAPbBr<sub>2</sub>Cl<sub>1</sub> QDs capped with octanoic acid and octylamine. Reaction conditions: 5-hydroxymethylfurfural (HMF) (12.5  $\mu$ mol), catalyst (4.5 mg), Ethyl acetate (2.5 mL), and 7.1 W blue light-emitting diodes.



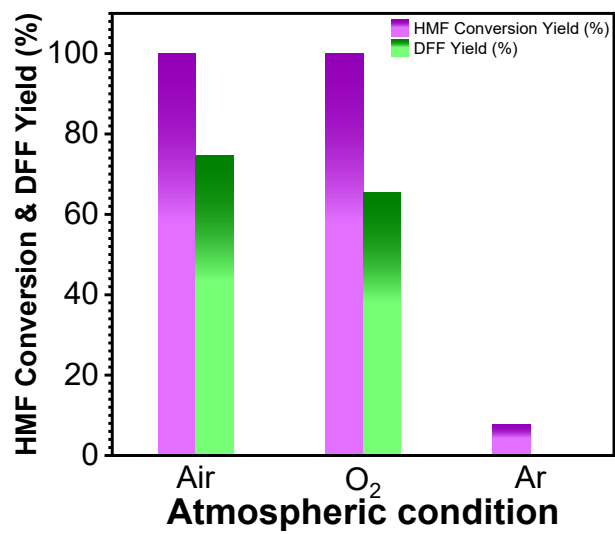

**Figure S7.** Various atmosphere condition for photocatalytic reaction using MAPbBr<sub>2</sub>Cl<sub>1</sub> QDs.

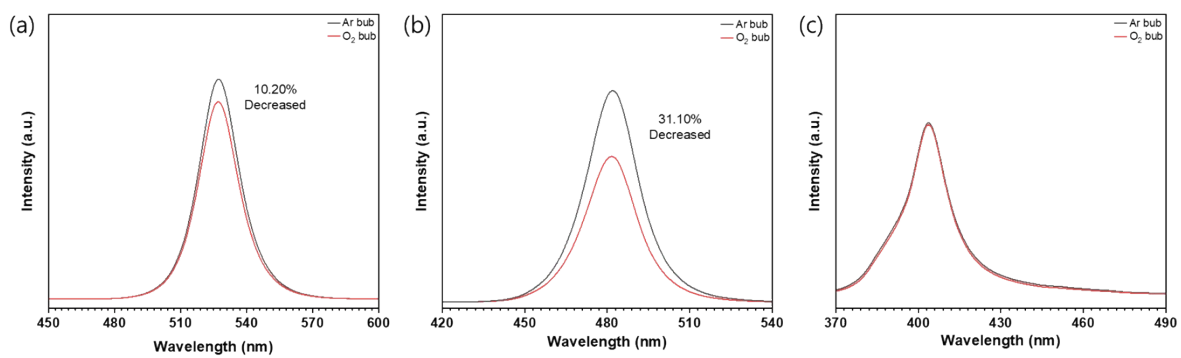

**Figure S8.** Photoluminescence (PL) quenching of (a) MAPbBr<sub>3</sub> QD (a) MAPbBr<sub>2</sub>Cl<sub>1</sub> QD (b) MAPbCl<sub>3</sub> QD with and without O<sub>2</sub>.

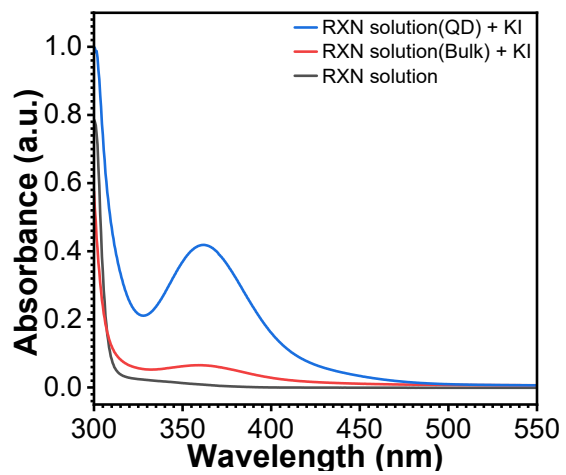

**Figure S9.** Absorption spectra of in the presence of KI for indicating  $\text{H}_2\text{O}_2$  generation as photocatalytic reaction progress using  $\text{MAPbBr}_2\text{Cl}_1$  QDs, bulk  $\text{MAPbBr}_2\text{Cl}_1$  and absence of photocatalyst.

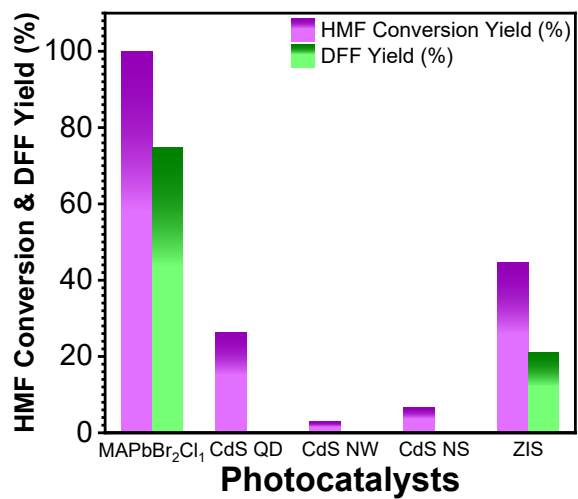

**Figure S10.** Comparison with CdS QDs, decorated CdS and Zinc Indium sulfide nanoparticles

**Table S1. The surface to inner concentration ratio of Br<sup>-</sup> and Cl<sup>-</sup> ions in the MAPbBr<sub>x</sub>Cl<sub>3-x</sub> QDs.**

| MAPb(Br <sub>x</sub> Cl <sub>1-x</sub> ) <sub>3</sub> | Br 3d |         | Cl 2p |         |
|-------------------------------------------------------|-------|---------|-------|---------|
|                                                       | Inner | Surface | Inner | Surface |
| -Br <sub>3</sub>                                      | 1     | 0.21116 | -     | -       |
| -Br <sub>2.5</sub> Cl <sub>0.5</sub>                  | 1     | 0.21109 | 1     | 0.41969 |
| -Br <sub>2</sub> Cl <sub>1</sub>                      | 1     | 0.21010 | 1     | 0.41977 |
| -Br <sub>1.5</sub> Cl <sub>1.5</sub>                  | 1     | 0.20991 | 1     | 0.41989 |
| -Br <sub>1</sub> Cl <sub>2</sub>                      | 1     | 0.20988 | 1     | 0.42001 |
| -Cl <sub>3</sub>                                      | -     | -       | 1     | 0.42118 |

**Table S2. Comparison of photocatalytic efficiency with other literatures.**

| Catal.                                                                 | Light Source                                       | Converted HMF ( $\mu\text{mole}$ ) | RXN Time (hr) | Catal. (mg) | Efficiency ( $\mu\text{mole}/\text{mg}\cdot\text{h}$ ) | Ref.              |
|------------------------------------------------------------------------|----------------------------------------------------|------------------------------------|---------------|-------------|--------------------------------------------------------|-------------------|
| UCNT                                                                   | 300 W Xe lamp (>420 nm)                            | 50.000                             | 5             | 100         | 0.1000                                                 | S1                |
| g-C <sub>3</sub> N <sub>4</sub>                                        | 300 W Xe lamp (>360 nm)                            | 85.600                             | 6             | 50          | 0.2853                                                 | S2                |
| SGCN                                                                   | Solar simulator (>400 nm, 100 mW/cm <sup>2</sup> ) | 13.800                             | 6             | 10          | 0.2300                                                 | S3                |
| Zn <sub>0.5</sub> Cd <sub>0.5</sub> S @1wt% MnO <sub>2</sub>           | 30 W WLED (>400 nm)                                | 7.391                              | 24            | 20          | 0.0154                                                 | S4                |
| TBA-W <sub>10</sub>                                                    | Xe lamp (400 mW/cm <sup>2</sup> )                  | 4.910                              | 2             | 2.5         | 0.9820                                                 | S5                |
| MCN-540 (g-C <sub>3</sub> N <sub>4</sub> )                             | Natural solar light                                | 37.125                             | 4             | 25          | 0.3713                                                 | S6                |
| TEO PCN-H <sub>2</sub> O <sub>2</sub>                                  | Natural solar light                                | 13.875                             | 4             | 50          | 0.0694                                                 | S7                |
| Nb <sub>2</sub> O <sub>5</sub>                                         | 300 W Xe lamp                                      | 0.096                              | 6             | 50          | 0.0003                                                 | S8                |
| 4.7% WO <sub>3</sub> /gC <sub>3</sub> N <sub>4</sub>                   | 300 W Xe lamp                                      | 0.242                              | 6             | 50          | 0.0008                                                 | S9                |
| CTF-Th/SBA15                                                           | 460 nm Blue LED (65 mW/cm <sup>2</sup> )           | 57.000                             | 30            | 10          | 0.1900                                                 | S10               |
| SGH-TiO <sub>2</sub>                                                   | Visible                                            | 11.8                               | 4             | 20          | 0.1475                                                 | S11               |
| MIL-53(Fe) (CM-10)                                                     | >360 nm Blue LED                                   | 76.5                               | 6             | 50          | 0.2550                                                 | S12               |
| CN-WO <sub>3</sub> @MnO <sub>2</sub>                                   | 420 nm LED (10 W)                                  | 11.64                              | 24            | 15          | 0.0323                                                 | S13               |
| 12% Bi <sub>2</sub> WO <sub>6</sub> /mpg-C <sub>3</sub> N <sub>4</sub> | 300 W Xe lamp (>400 nm)                            | 0.297                              | 8             | 50          | 0.0007                                                 | S14               |
| TMADT                                                                  | 35 W Visible light (W/Bromine)                     | 91.8                               | 12            | 5.3         | 1.4434                                                 | S15               |
| ZnIn <sub>2</sub> S <sub>4</sub> 2D                                    | Blue LED ( $\lambda_{\text{max}}=467$ nm)          | 38                                 | 2             | 10          | 1.9000                                                 | S16               |
| MAPbBr <sub>2</sub> Cl <sub>1</sub> QD                                 | 445 nm Blue LED                                    | 12.500                             | 1.5           | 4.5         | 1.8519                                                 | <b>This study</b> |

## References

- S1. X. Bao, M. Liu, Z. Wang, D. Dai, P. Wang, H. Cheng, Y. Liu, Z. Zheng, Y. Dai and B. Huang, *ACS Catal.*, 2022, **12**, 1919-1929.
- S2. Q. Wu, Y. He, H. Zhang, Z. Feng, Y. Wu and T. Wu, *Mol. Catal.*, 2017, **436**, 10-18.
- S3. V. R. Battula, A. Jaryal and K. Kailasam, *J. Mater. Chem. A*, 2019, **7**, 5643-5649.
- S4. S. Dhingra, T. Chhabra, V. Krishnan and C. M. Nagaraja, *ACS Appl. Energy Mater.*, 2020, **3**, 7138-7148.
- S5. Z. Li, M. Zhang, X. Xin and H. Lv, *ChemCatChem*, 2021, **13**, 1389-1395.
- S6. I. Krivtsov, E. I. García-López, G. Marci, L. Palmisano, Z. Amghouz, J. R. García, S. Ordóñez and E. Díaz, *Appl. Catal. B: Environ.*, 2017, **204**, 430-439.
- S7. M. Ilkaeva, I. Krivtsov, E. I. García-López, G. Marci, O. Khainakova, J. R. García, L. Palmisano, E. Díaz and S. Ordóñez, *J. Catal.*, 2018, **359**, 212-222.
- S8. H. Zhang, Q. Wu, C. Guo, Y. Wu and T. Wu, *ACS Sustain. Chem. Eng.*, 2017, **5**, 3517-3523.
- S9. H. Zhang, Z. Feng, Y. Zhu, Y. Wu and T. Wu, *J. Photochem. Photobiol. A*, 2019, **371**, 1-9.
- S10. C. Ayed, W. Huang, G. Kizilsavas, K. Landfester and K. A. I. Zhang, *ChemPhotoChem*, 2020, **4**, 571-576.
- S11. A. Khan, M. Goepel, A. Kubas, D. Lomot, W. Lisowski, D. Lisovytskiy, A. Nowicka, J. C. Colmenares and R. Glaser, *ChemSusChem*, 2021, **14**, 1351-1362.
- S12. D. Huang, H. Wang and Y. Wu, *Molecules*, 2022, **27**, 8537.
- S13. H. Qian, Q. Hou, W. Zhang, Y. Nie, R. Lai, H. Ren, G. Yu, X. Bai, H. Wang and M. Ju, *Appl. Catal. B: Environ.*, 2022, **319**, 121907.
- S14. L. Cheng, D. Huang, Y. Zhang and Y. Wu, *Appl. Organomet. Chem.*, 2021, **35**, e6404.
- S15. B. Yang, W. Hu, F. Wan, C. Zhang, Z. Fu, A. Su, M. Chen and Y. Liu, *Chem. Eng. J.*, 2020, **396**, 125345.
- S16. S. Ding, J. B. Gabriel Filho, T. Peppel, S. Haida, J. Rabeah, N. Steinfeldt and J. Strunk, *Sustain. Energy Fuels*, 2023, **7**, 4396-4400.
